# Supplementary material for: Targeted sequencing of cancer‐related genes in nasopharyngeal carcinoma identifies mutations in the TGF‐β pathway
Source: PubMed Central journal article supplement (PMC6718742; doi:10.1002/cam4.2429), 2019-07-22
Supplement: CAM4-8-5116-s006.pdf [file CAM4-8-5116-s006.pdf]

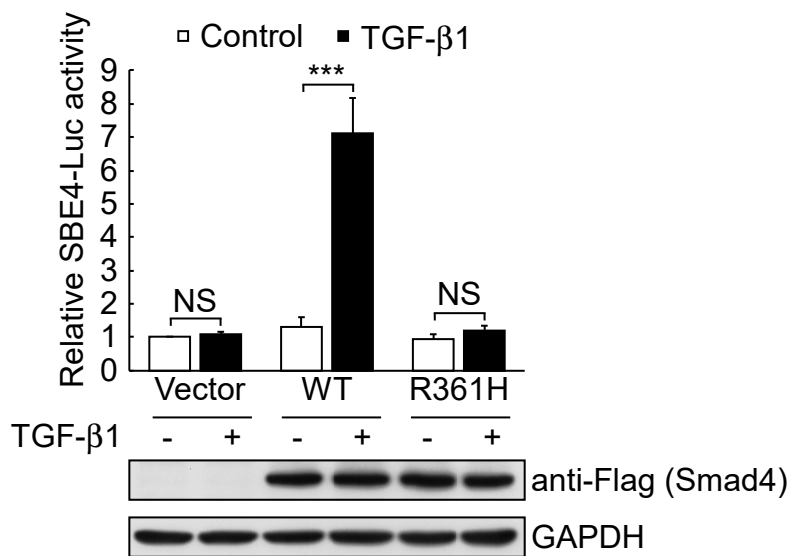

**Fig. S6. The R361H loss-of-function mutation in SMAD4 inactivates TGF-β/SMAD signaling in MBA-MD-468 cells.**
